# Supplementary material for: Complete validation of a continuous and blood-correlated sweat biosensing device with integrated sweat stimulation
Source: Royal Society of Chemistry journal article supplement (doi:10.1039/c8lc01082j), 2018-01-01
Supplement: c8lc01082j1.pdf [file c8lc01082j1.pdf]

**Table S2** Complete bill of materials.

| Part                    | Material                             | Part Number                          | Source               |
|-------------------------|--------------------------------------|--------------------------------------|----------------------|
| general patch assembly  | release liner                        | 3M 1361                              | 3M                   |
|                         | medical grade double sided adhesive  | 3M 1577                              | 3M                   |
|                         | non-woven cloth                      | Tex-Wipe                             | Fisher Scientific    |
|                         | medical grade double sided adhesive  | 3M 1577                              | 3M                   |
|                         | hydrophobic diagnostic adhesive film | 3M 9793R                             | 3M                   |
| stimulation             | non-woven cloth                      | Tex-Wipe                             | Fisher Scientific    |
|                         | membrane                             | NFX                                  | Synder Filtration    |
|                         | 1 mm acrylic stock                   | NA                                   | McMaster-Carr        |
|                         | carbon kapton film                   | Kapton 200RS100                      | Dupont               |
|                         | adhesive skin electrode              | Skintact RT41                        | Skintact             |
| stimulant gel           | agarose                              | A9539                                | Sigma Aldrich        |
|                         | carbachol                            | NA                                   | PCCA                 |
| sensor                  | electrodes                           | DropSens 550                         | University of Toledo |
|                         | chitosan                             | NA                                   | University of Toledo |
|                         | enzyme                               | NA                                   | University of Toledo |
|                         | fumed silica                         | S5130                                | Sigma Aldrich        |
|                         | gelatin                              | Knox original gelatine unflavored    | Knox                 |
| hex wick                | ITO PET                              | G430300                              | ShelDahl             |
|                         | SU-8                                 | 3050                                 | MicroChem            |
|                         | Thiol                                | 7-mer (3 cysteine groups, tri-thiol) | Genscript            |
| artificial sweat        | proprietary blend                    | NA                                   | Eccline Systems      |
| sensor characterization | ethanol                              | 2701                                 | Decon Laboratories   |
|                         | BSA                                  | A2153                                | Sigma Aldrich        |
|                         | stearic acid                         | S5690-500G                           | Aqua Solutions       |
|                         | dextrose                             | D9434-250G                           | Sigma Aldrich        |
| electrical connection   | PBS                                  | BP661-10                             | Fisher Chemical      |
|                         | breakout board                       | FPC stick                            | Adafruit             |
|                         | 5 pin FFC cable                      | HF05U-05-ND                          | Digi-Key             |
|                         | 5 pin FFC cable connector            | WM10937CT-ND                         | Digi-Key             |
|                         | z-axis tape                          | 3M 9705                              | 3M                   |

**Table S3** Layer identification, material and purpose for integrated patch design.

| Layer Code | Layer Name          | Material                                  | Part Number          | Source               | Purpose                                                                 |
|------------|---------------------|-------------------------------------------|----------------------|----------------------|-------------------------------------------------------------------------|
| A1         | carrier             | release liner                             | 3M 1361              | 3M                   | protect patch prior to applying to application                          |
| A2         | skin adhesive       | medical grade double sided adhesive       | 3M 1577              | 3M                   | adhere patch to skin                                                    |
| A3         | sensor              | electrodes, chitosan, enzyme, <i>etc.</i> | various, see Tab 4.3 | University of Toledo | ethanol detection                                                       |
| A4         | pump                | non-woven cloth                           | Tex-Wipe             | Fisher Scientific    | maintain continuous sample flow in wick                                 |
| B1         | hex wick            | SU-8, ITO PET, Au, thiol                  | various, see Tab 4.3 | various, see Tab 4.3 | collect and deliver sample to sensor                                    |
| B2         | adhesive            | medical grade double sided adhesive       | 3M 1577              | 3M                   | adhere wick to both sensor and skin, adhere stimulant assembly to patch |
| C1         | stimulant coupling  | non-woven cloth                           | Tex-Wipe             | Fisher Scientific    | provide skin contact for stimulant in iontophoresis                     |
| C2         | membrane            | nanofiltration membrane                   | NFX                  | Synder Filtration    | isolate stimulant from skin until iontophoresis                         |
| C3         | gel well            | 1 mm acrylic stock                        | NA                   | McMaster-Carr        | contain stimulant fluids                                                |
| C4         | stimulant gel       | agarose, carbachol                        | various, see Tab 4.3 | various, see Tab 4.3 | store stimulant                                                         |
| C5         | stimulant electrode | carbon kapton film                        | Kapton 200RS100      | Dupont               | iontophoresis                                                           |
| C6         | return electrode    | EKG electrode                             | Skintact RT41        | Skintact             | iontophoresis                                                           |
| C7         | vapor seal          | hydrophobic diagnostic adhesive film      | 3M 9793R             | 3M                   | prevent evaporation                                                     |

**Table S4** Estimated constants for Eq. 1-3 determined by curve fitting simulations.

| subject-trial ID                                         | 1-1      | 1-2      | 2-1      | 2-2      |
|----------------------------------------------------------|----------|----------|----------|----------|
| $C_{SP}$ (%* $\mu\text{A}^{-1}\cdot\text{h}^{-1}$ )      | 4.62E-14 | 3.94E-12 | 1.05E-01 | 1.46E-13 |
| $k_{SP}$ ( $\text{h}^{-1}$ )                             | 5.94E-03 | 1.12E-01 | 1.15E-01 | 1.98E-01 |
| $R_{SP}$                                                 | 3.44E+01 | 3.09E+00 | 6.90E+00 | 7.00E+00 |
| $k_d$ ( $\text{h}^{-1}$ )                                | 1.96E+00 | 1.00E+00 | 3.73E-01 | 2.89E+00 |
| $k_{PS}$ ( $\text{h}^{-1}$ )                             | 1.50E-01 | 1.74E-02 | 4.11E+00 | 1.44E+00 |
| $C_{PS}$ ( $\mu\text{A}\cdot\%^{-1}\cdot\text{h}^{-1}$ ) | 2.60E+00 | 4.55E+01 | 4.55E+00 | 1.62E+01 |
| $k_{abs}$ ( $\text{h}^{-1}$ )                            | 4.55E-02 | 9.45E-02 | 9.99E-02 | 6.12E-02 |
| $R_{AP}$                                                 | 4.64E+01 | 4.39E+01 | 5.00E+01 | 1.17E+01 |
| MSE                                                      | 9.60E-03 | 1.79E-02 | 3.18E-02 | 2.68E-03 |

Optimization settings:

differential evolution

bounds = (0, 50)

tol = 10E-12

maxiter = 3500

**Table S5** Model fit results for R<sup>2</sup> and 95% confidence intervals.

| Type                             | R <sup>2</sup> and 95% CI |                         |                         |                         |
|----------------------------------|---------------------------|-------------------------|-------------------------|-------------------------|
|                                  | Subject 1                 |                         | Subject 2               |                         |
|                                  | Trial 1                   | Trial 2                 | Trial 1                 | Trial 2                 |
| <b>Model Data**</b>              | 0.08 (0.02, 0.13)         | 0.55 (0.50, 0.60)       | 0.73 (0.68, 0.78)       | 0.76 (0.72, 0.80)       |
| <b>Raw Data **</b>               | 0.32 (-0.01, 0.64)*       | 0.65 (0.52, 0.77)*      | 0.64 (0.37, 0.91)*      | 0.95(0.93, 0.98)*       |
| <b>Model Data Peak Corrected</b> | 0.9501 (0.9436, 0.9566)*  | 0.9855 (0.9840, 0.9870) | 0.9992 (0.9990, 0.9993) | 0.9986 (0.9984, 0.9988) |
| <b>Raw Data Peak Corrected</b>   | 0.81 (0.6570, 0.9624)*    | 0.9582 (0.9334, 0.9830) | 0.9562 (0.9316, 0.9808) | 0.8975 (0.8115, 0.9835) |

\* Exponential fit

\*\* This is for completion purposes as the modeling is irrelevant due to the time lag (see ESI Fig. S6 a and c)

**Table S6** Pearson correlations made for linear BAC (and sweat predictive for model data) to ethanol sensor data peak-corrected data.

| Pearson Correlation              | Subject 1 |         | Subject 2 |         |
|----------------------------------|-----------|---------|-----------|---------|
| Type                             | Trial 1   | Trial 2 | Trial 1   | Trial 2 |
| <b>Model Data Peak Corrected</b> | NA        | 0.9927  | 0.9996    | 0.9993  |
| <b>Raw Data Peak Corrected</b>   | NA        | 0.9789  | 0.9779    | 0.9474  |
