# Supplementary material for: Complete validation of a continuous and blood-correlated sweat biosensing device with integrated sweat stimulation
Source: Royal Society of Chemistry journal article supplement (doi:10.1039/c8lc01082j), 2018-01-01
Supplement: c8lc01082j5.xlsx [file c8lc01082j5.xlsx]

## Sheet: Table S1
					qualitative comparisons									quantitative comparisons
					front end electronics	iontophoretic stimulation			sample management			data correlated
Journal	Group	Year	Highlight (1st's?)	Human Subjects	front end electronics	integrated	skin isolation	sample isolation	integrated	mixing prevention	sensor-skin isolation	sweat	blood	Sampling Temporal Resolution	Sweat Vol. Required	Time to 1st Sample	uninterupted sampling duration	sample-to-sensor method	Analyte	Biorecognition	Monitoring	Sweat Generation
Biosensors and Bioelectronics	Munoz (Barcelona)	2009-02-15	1st integration stimulation/sensors	yes	ü	ü						ü		single measurement	sensor on skin	?	single measurement	sensor on skin	Cl-	Ag/AgCl	potentiometric	integrated iontophoresis
Sensors and Actuators B: Chemical	Diamond	2009-05-20	1st wearable platform	yes	ü				ü	ü-	ü	ü		continuous? (colorimetric)	?, could calculate	25-30 min	<60 min	polymer fabric wick	n/a (pH)	colorimetric	colorimetric	exercise
Analytical Methods	Diamond	2010-01-27	1st electrochemcial sensor	yes					ü	ü-	ü	ü		continous (read manually)	?, could calculate	?	<60 min	polymer fabric wick	Na+	ISE	potentiometric	exercise
Analytical Chemistry	Wang	2013-07-01	1st on-skin (tattoo) sensor	yes								ü-		continuous	sensor-on-skin	~20 min	35 min	sensor on skin	lactate	enzyme	amperometric	exercise
Analyst	Wang	2013-07-26		yes										continuous	sensor-on-skin	25 min	40 min	sensor on skin	ammonium	ISE	potentiometric	exercise
Analytica Chemica Acta	Pingarron (Madrid)	2014-01-01	1st blood correlation	yes	ü				ü		ü		ü	continuous? or single use	?	?	2 hr?	membrane and prefilled buffer reservoir	EtOH	enzyme	amperometric	iontophoresis by macroduct
Small	Rogers	2014-04-06	1st u-fluidic sampling	yes					ü		ü	ü		2 hour?	?	2 hour?	2 hour?	sponges	n/a (pH)	colorimetric	colorimetric	exercise
Biosensors and Bioelectronics	Wang	2014-04-15	1st integrated front end	yes	ü									continuous	sensor-on-skin	20 min	30 min	sensor on skin	Na+	ISE	potentiometric	exercise
Electrochemistry Communications	Wang	2015-02-28	1st use of stripping voltammetry/heavy metals	yes								ü		single measurement	sensor-on-skin	single measurement	single measurement	sensor on skin	Zn	plate and strip	stripping voltammetry	exercise
IEEE Transactions	Rose	2015-06-15	1st in-vitro phone interface	no	ü													sensor on skin	ion	ISEs	potentiometric	no sweat - PBS sol'ns
Nature	Javey	2016-01-01	1st multi-analyte, most sophisticated front end 1st in-vivo phone interface	yes	ü				ü	ü-	ü	ü-		claim is 1 min based on 3-4 uL/min/cm2 sweat rate (see methods)	10 uL to fill rayon	8-12 min	50 min	rayon	Glucose, Lactate, Na+, K+	Enzyme, ISE	amperometric, potentiometric	exercise
Nature: Scientific Reports	Prasad (U of Texas at Dallas)	2016-03-21		no											3-6 uL			N/A	EtG (for ETOH)	capture antibody	EIS	purchased (real)
ACS Sensors	Javey	2016-05-09	1st multi-heavy metal	yes								ü		5 min	sensor-on-skin	15 min	25 min	sensor on skin	Zn, Cu, Cd, Pb, Hg	plate and strip	stripping voltammetry	exercise
Nature: Communications	Wang	2016-05-23		yes	ü									continuous	sensor-on-skin	10-15 min	30 min	sensor on skin	lactate	enzyme	amperometric	exercise
Nature: Nanotechnology	Kim (Seoul Nat'l Univeristy)	2016-06-01	integrated u-needle insulin delivery	yes					ü		ü	ü	ü	1 hr	20 uL	15 min (see ESI)	single measurements over 24 hr	nafion wick	glucose	enzyme	amperometric	exercise
ACS Nano	Javey	2016-07-05		yes	ü							ü		continuous	sensor-on-skin	10 min	30 min	sensor on skin	Ca2+	ISE	potentiometric	exercise
ACS Sensors	Wang	2016-07-12	1st wearable stimulation/sensor integration	yes	ü	ü							ü	15 min (single measurements)	sensor-on-skin	5 min	single measurements	sensor on skin	EtOH	enzyme	amperometric	iontophoresis (integrated)
Science Translational Medicine	Rogers	2016-11-23	1st u-fluidic sampling/sensor integration	yes					ü		ü	ü		single measurement	5-10 uL (for colorimetric reservoir)	1 hr (single mearurement)	1 hr (single mearurement)	polymer u-fluidics	Cl, lactate, pH, glucose	colorimetric	colorimetric	exercise
Sensors and Actuators B: Chemical	Prasad (U of Texas at Dallas)	2017-01-31		no														N/A	glucose	non-enzymatic	EIS	purchased
PNAS	Javey	2017-02-14		yes	ü	ü			ü		ü	ü	ü (glucose only)	continuous for ions ex situ glucose	?	20 min (ion)	25 min (ion)	rayon	glucose (ex situ), Na+, Cl-	enzyme, ISE	amperometric, potentiometric	iontophoresis (integrated)
Science Advances	Kim (Seoul Nat'l Univeristy)	2017-03-08		yes					ü		ü	ü		?	1 uL	10 min	?	Nafion wick	glucose	enzyme	amperometric	exercise
Lab on a Chip	Sonner	2017-06-26		yes		ü		ü						continuous	sensor on skin	<5 min	30 min	sensor on skin	ion	ISEs	potentiometric	iontophoresis (integrated)
Nature: Scientific Reports	Prasad (U of Texas at Dallas)	2017-10-17		no										~7 min	1-5 uL	n/a		N/A	cortisol	antibody on MoS2 nanosheets	EIS	purchased (real)
ACS Sensors	Wang	2017-11-20	1st polymer channel/electrochemical sensor integration	yes	ü				ü		ü			continuous	8.72 uL	13.4 min	20 min	reservoir to polymer channels	lactate, glucose	enzyme	amperometric	exercise
Applied Materials and Interfaces	Ha (Korea Univeristy)	2018-04-06	1st on-body non-enzymatic glucose sensor	yes								ü		1 hr (single mearurement)	sensor on skin	20 min	12 hr (1/hr)	sensor on skin	glucose (and pH)	CNTs/CoWO4 nanomaterials	amperometric	exercise
Advanced Materials	Javey	2018-04-16	1st diff pulse voltammetry	yes	ü							ü-		10 min	sensor on skin	20 min	40 min	sensor on skin	caffeine	CNT/Nafion - (diff pulse method gives selectivity)	differential pulse voltammetry	exercise
Nature: Scientific Reports	Prasad (U of Texas at Dallas)	2018-04-25		no											1-3 uL			N/A	EtOH, glucose	enzyme	EIS	purchased (real and synthetic)
ACS Sensors	Javey	2018-05-09	adds sweat rate sensor to polymer channel based sampling	yes	ü				ü		ü	ü		continuous	~8 uL	20 min	25 min	reservoir to polymer channels	sweat rate, Na+	impedance, ISE	impedance, potentiometric	exercise
Lab on a Chip	Diamond	2018-07-31		yes	ü				ü		ü			continuous	64 uL	46 min	20 min	reservoir to polymer channels	Na+, K+	ISE	potentiometric	exercise
Advanced Science	Wang	2018-08-02	1st stimulation/reverse iontophoresis combo	yes	ü	ü			ü		ü		ü	30 min	?	5 min	single measurements	hydrogel	EtOH (sweat), glucose (ISF)	enzyme	amperometric	iontophoresis (integrated)
Electroanalysis	Wang	2018-08-22		yes	ü				ü		ü			continuous	8.72 uL	15 mn	35 min	reservoir to polymer channels	Na+, K+	ISE	potentiometric	exercise
